# Supplementary material for: Ground-based Investigation of HO x and Ozone Chemistry in Biomass Burning Plumes in Rural Idaho
Source: Copernicus journal article supplement (doi:10.5194/acp-2021-702), 2021-09-28
Supplement: Supplementary file 2 [file acp-2021-702-supplement.pdf]

## Supplementary Information

### S1 ECHAMP Calibrations

5 Figure S1 shows ECHAMP CH<sub>3</sub>I calibration results. The amplification factor is equal to the amplified [NO<sub>2</sub>] signal divided by the calibrated XO<sub>2</sub> concentration. Ambient [XO<sub>2</sub>] was calculated by dividing the chemical amplification NO<sub>2</sub> signal by the RH-dependent amplification factor. The 2 sigma uncertainty of 27% was determined by combining in quadrature the error in calibration concentrations from the CH<sub>3</sub>I method with the error in the calibration slope due to variability among individual calibration points. Anderson et al. (2019) derived the 2-sigma uncertainty of this method at 20%. The 2-sigma error in the  
10 calibration slope was 18%.

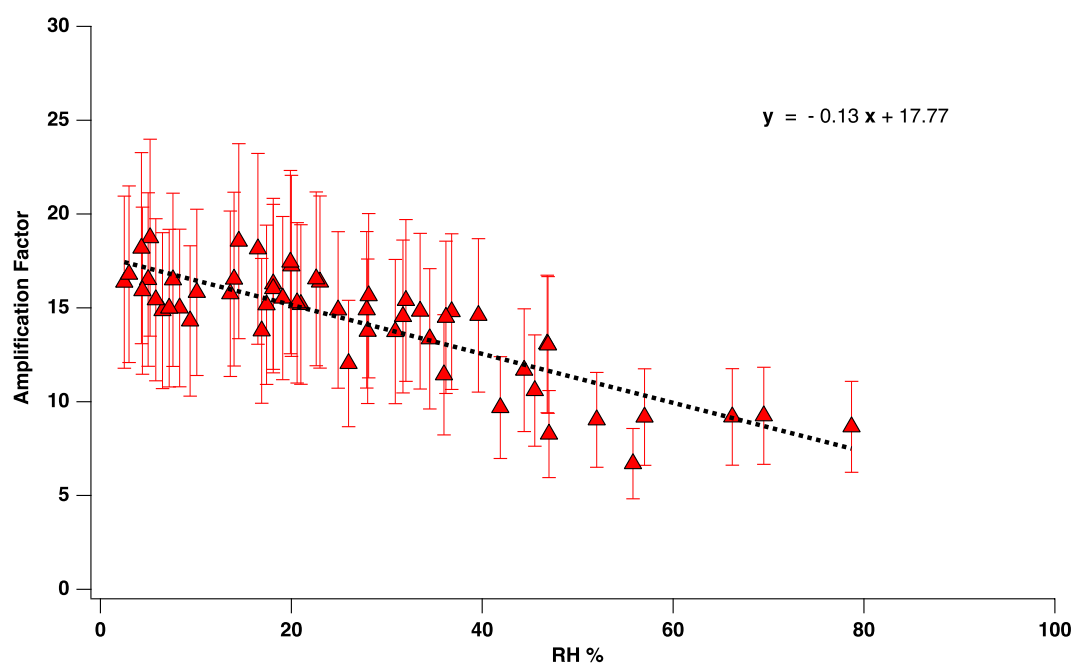

15 **Figure S1.** ECHAMP calibration results for FIREX 2018 campaign. Calibrations were conducted using the CH<sub>3</sub>I based method. Indicated uncertainties are the ECHAMP measurement uncertainty of 27% (2  $\sigma$ ).

### S2 HYSPLIT Back trajectories

NOAA Air Resources Laboratory HYbrid Single Particle Lagrangian Integrated Trajectory (HYSPLIT) (Stein et al., 2015) were used to speculate BB smoke sources for smoke influenced periods. Normal backward trajectories from the McCall, Idaho site coordinates of 44.8717° N and 116.1154° W were acquired using archived GDAS (1 degree, global, 2006 present)  
20 meteorology. Model vertical velocity was selected for the vertical motion method. Trajectories were acquired for all days of the field deployment. Files were acquired starting at 0:00 MDT with 48-hr back trajectories generated starting at each hour of the day. Height was selected at 10 m above ground level to best simulate site air. The height input was varied with values of 50m, 100 m,

and 500 m for all dates to test possible interferences due to the mountain geography. Varying height had little impact overall with minimal changes observed for heights input 100 m and lower.

## 25 S3 Wildfire Sources

Maps that included HYSPLIT back trajectories and active wildfire locations were used to infer BB smoke sources for smoke influenced periods in McCall, Idaho. Results for the 17 August smoke event are presented in Figure 1 of the main text and are discussed in depth there. Here, we share results for BB influenced periods of 16 August, 22 August, 23 August, 24 August.

30 The 16 August smoke event began at 18:48 MDT (with [HCN] > 1.0 ppb) and persisted until 21:55 MDT. This BB-influenced period coincides with the 18:00 MDT, 20:00 MDT, and 22:00 MDT back trajectories in Figure S2. These trajectories are all similar and near a few active fires, while the earlier trajectories mostly avoid the active wildfires. Three wildfires are indicated in Figure S2 - the Rattlesnake Creek Fire, the Mesa Fire, and the same unspecified wildfire suggested as responsible for the 17 August smoke event. This unspecified active wildfire is in closest proximity (within 5 km) for the trajectories of interest at 4-10 hrs backwards in time and is therefore the most likely source for BB smoke influence. However, the Rattlesnake Creek Fire may have also contributed as this fire was located farther downwind but within 20 km of trajectories. The Mesa Fire is the least likely source of BB smoke influence because it is farther than 20 km away of the trajectories of interest. The Mesa Fire is within close proximity of the 16:00 MDT trajectory only, prior to the BB smoke influenced period.

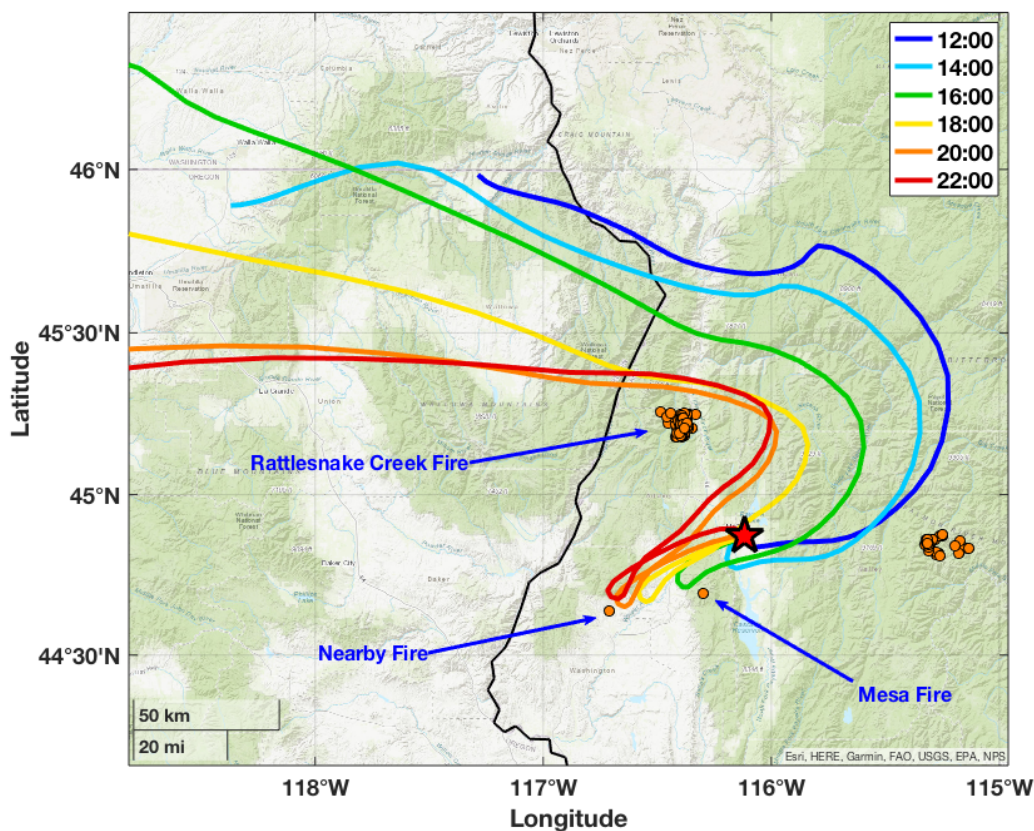

40 **Figure S2.** Bihourly HYSPLIT 48-hr back trajectories arriving at the McCall site (indicated by the red star) for the smoke influenced day of 16 August. Active wildfires of 15 August and 16 August are indicated by orange markers. Fire locations were retrieved using the NOAA Hazard Mapping System (HMS) (NOAA, 2021).

45 The trajectories for 22 August show site air being ultimately sourced from the northeast, though much of the transit time  
is spent directly east of the McCall site (Figure S3). The Hazard Mapping System (HMS) wildfire data indicates wildfires mostly  
absent in this region for the 21-22 August date range. A few wildfires located directly east of McCall, Idaho were consistently  
observed during the field deployment (all wildfire HMS data is shown in Figure 1 of main text). These fires, while undetected here,  
were detected both before and after this date range and include the Rabbit Foot Fire indicated in Figure 1 of the main text as well  
50 as two similarly sized fires located midway between the Rabbit Foot Fire and McCall, Idaho. These unspecified wildfires, even  
though they are undetected here, are a likely source as trajectories travel directly over the areas detected on other dates. The  
trajectories range 12-18 hours from these unspecified wildfires, though older smoke from a farther away source could have been  
sampled.

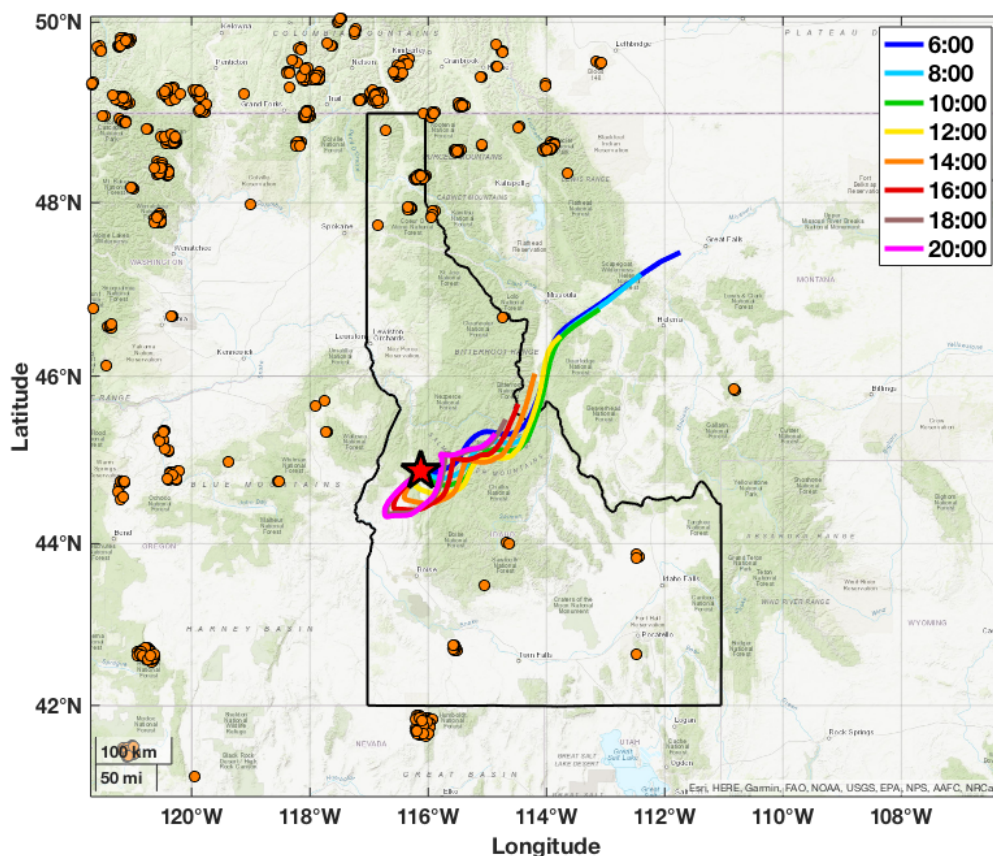

55 **Figure S3.** Same as Fig. S2 but for 22 August. Active wildfires (orange markers), which were acquired using HMS (NOAA, 2021), are shown  
for 21 August and 22 August.

60 Results for 23 August are shown in Figure S4. Trajectories before 12:00 MDT show air was transported from the  
southeast, while trajectories starting at 12:00 MDT show that air was transported from the southwest. This change in trajectories  
coincides with the BB influenced period beginning in the at 12:26 MDT and persisting through the end of the night (distinct BB  
smoke conditions with  $[HCN] > 1.0$  ppb ended at 17:07 MDT but smoke tracers remained somewhat elevated after). One nearby  
fire was detected but is only in close proximity (within 5 km) to trajectories after the distinct BB influenced period. Conditions

65 remained somewhat smoky after the distinct smoke period ended at 17:07 MDT, which this unspecified nearby fire likely contributed, with smoke tracers remaining elevated, but [HCN] falling just below 1.0 ppb. The Mesa Fire, however undetected here, may have contributed as many trajectories travel over or near the Mesa Fire areas detected on other days. As we are uncertain regarding the source of the sampled smoke, we suggest a moderate age of 12-18 hrs, though the plume impacting the site could be fresher with ages near 6 hrs.

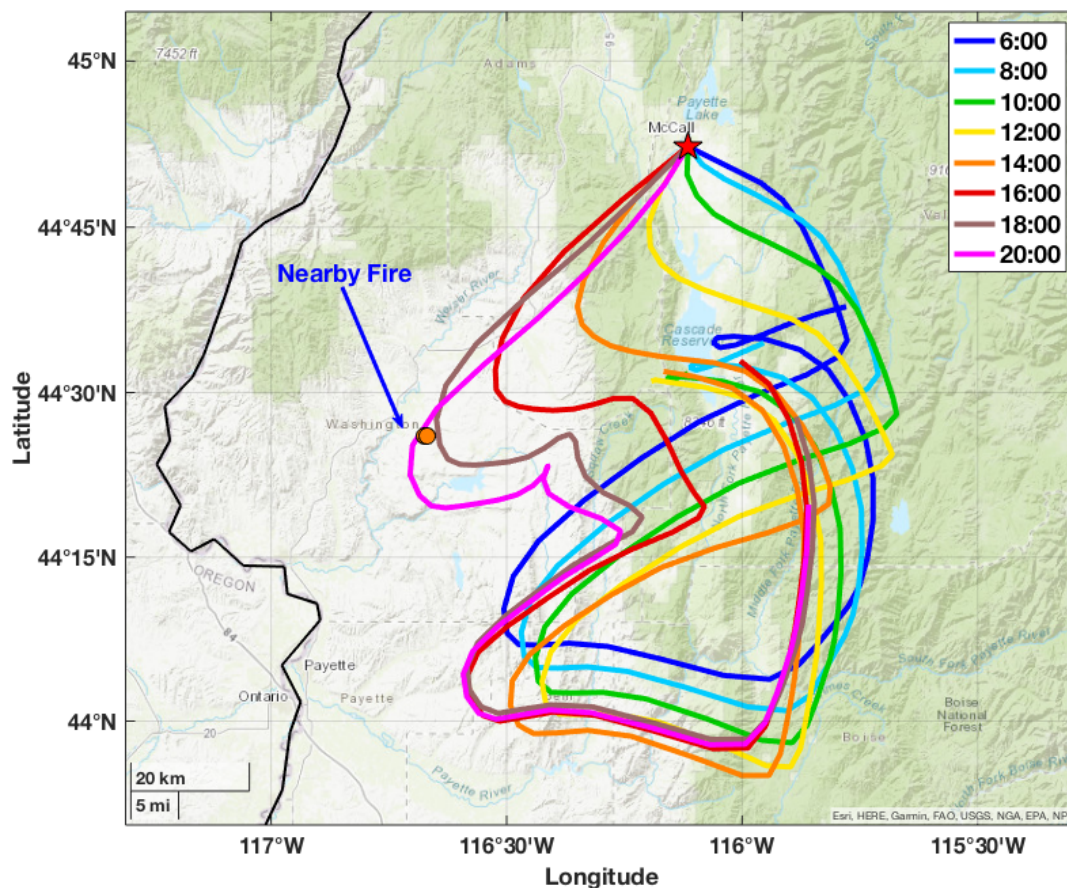

70 **Figure S4.** Same as Fig. S2 but for 23 August. Active wildfires (orange markers), which were acquired using HMS (NOAA, 2021), are shown for 22 August and 23 August.

75 Figure 5 shows back trajectories for 24 August. Beginning with the 4:00 MDT trajectory, site air was sourced from Oregon. A cluster of fires likely responsible for the BB influenced period at 7:42 MDT is indicated in Figure S5. The estimated transport time ranges 18-30 hours.

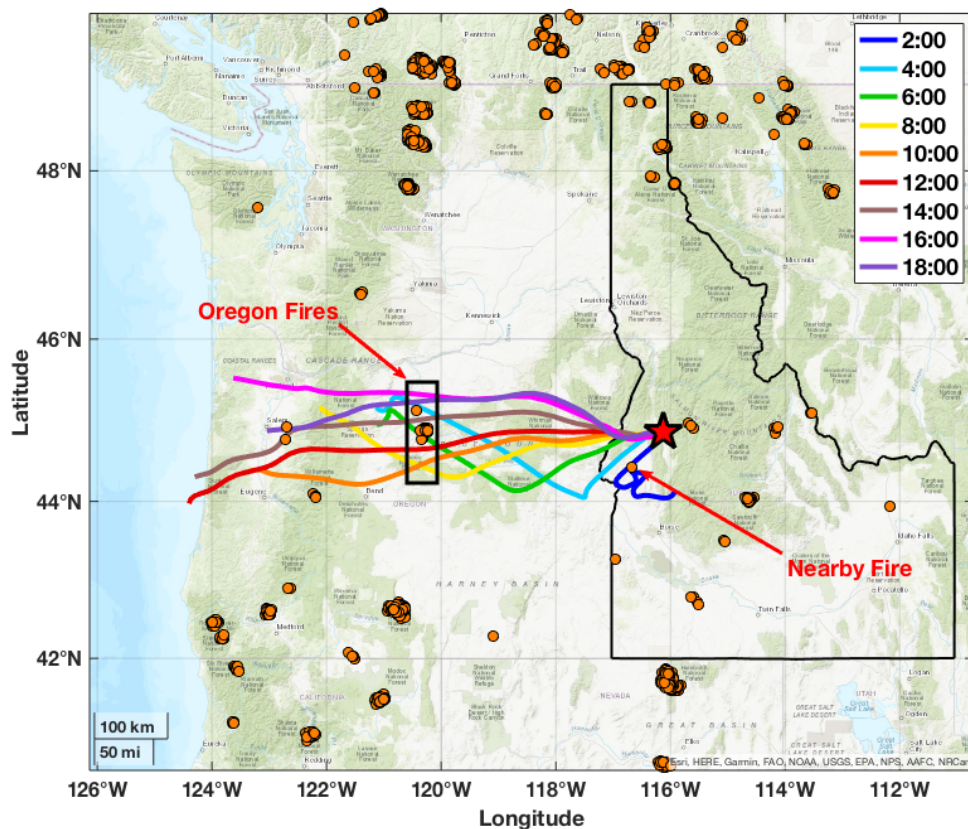

**Figure S5.** Same as Figures S2 but for 24 August. Active wildfires (orange markers), which were acquired using HMS (NOAA, 2021), are shown for 24 August and 25 August.

## 80 S4 Ozone Enhancement Ratios

Ozone enhancement ratios ( $\Delta O_3/\Delta CO$ ) were determined using York bi-variate linear regressions. The  $\Delta O_3/\Delta CO$  slopes for the four smoke events are shown in Figure S6. The 16 August event is absent from Figure S6 and was instead calculated by simple subtraction of a stable background period from a stable BB influenced period as recommended by Jaffe and Wigder (2012). This avoided a temporary depletion in  $O_3$  by  $\sim 20$  ppbv during the BB influenced period.

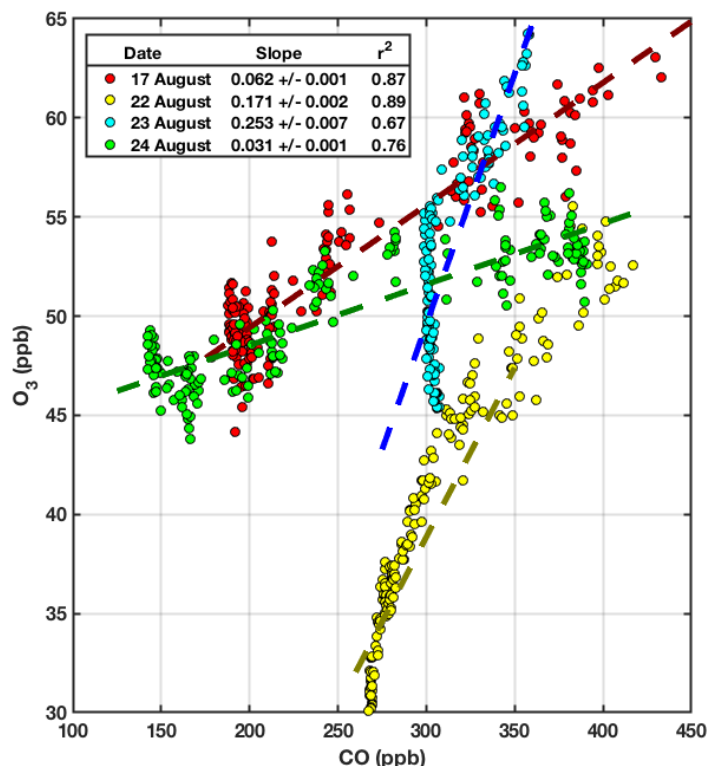

85

**Figure S6.** Comparisons of 2-minute O<sub>3</sub> and CO data that were used to derive biomass burning ozone enhancement ratios ( $\Delta O_3/\Delta CO$ ) for the 17, 22, 23, and 24 August BB smoke events. Each set of data plotted was collected continuously and with the selected periods including 60 minutes of background air, a transition to or from BB smoke influence, and 60 minutes of significant BB smoke influence ([HCN]>1.0 ppb).

## 90 S5 Photolysis Frequencies

The National Center for Atmospheric Research (NCAR) Tropospheric Ultraviolet and Visible (TUV) model was used to acquire  $J_{NO_2}$  and  $J_{O_3}$  in 1-minute intervals. Notable TUV inputs included latitude and longitude of 44.9° and -116.1°, elevation of 1.53 km, the daily O<sub>3</sub> column value, surface albedo of 0.2, and single scattering albedo of aerosols of 0.99. Daily O<sub>3</sub> column values were input as 295, 297, and 291 Dobson units for the 16 to 18 August period, respectively, and 316, 326, 306, and 315 for the 21 to 24 August period. These daily values were sourced using Ozone Monitoring Instrument (OMI) data.

95

The TUV photolysis outputs were then scaled using ARISense solar irradiance data in order to account for fluctuations due to clouds and BB smoke. TUV outputs were first synchronized in time to align with daily peak ARISense readings. We considered the ARISense solar cycle of 21 August as the standard profile as there were essentially no interferences. This standard profile was scaled to match the peak values of each day and better align with overall ARISense observations. We then implemented any relative changes in solar irradiance measurements compared the standard profile into our TUV model  $J_{NO_2}$  and  $J_{O_3}$  outputs. ARISense data was not collected for most of 18 August so TUV outputs were not scaled.

100

## S6 Model Description

The Framework for 0-D Atmospheric Modeling (F0AM) version 3.2 box model (Wolfe et al., 2016) was used to model photochemistry and evaluate our peroxy radical measurements. In the main text, we briefly described the four chemical mechanisms that were employed. Three mechanisms (MCM-base, MCM-BBVOC, and MCM-BBVOC-het) involved using a

105

subset of the Master Chemical Mechanism (Jenkin et al., 2003;Saunders et al., 2003) version 3.3.1 (MCMv331) (Jenkin et al., 2015). The final mechanism was the base GEOS-Chem mechanism version 9-02 (Mao et al., 2013) with isoprene chemistry updates (Fisher et al., 2016;Marais et al., 2016;Travis et al., 2016;Kim et al., 2015). For all cases, the model was run using a model time-step of 2 minutes, with all observational constraints held constant throughout model steps. Concentrations of model intermediates were linked so that intermediates were initialized with concentrations predicted at the previous step.

Observational constraints included measured concentrations of water vapor, O<sub>3</sub>, NO, NO<sub>2</sub>, CO, CH<sub>4</sub>, isoprene, monoterpenes, 2-methyl-3-buten-2-ol (MBO), methyl vinyl ketone (MVK), methacrolein (MACR), formaldehyde, acetaldehyde, ethane, ethyne, formic acid, acetic acid, acetone, MEK, benzene, toluene, C<sub>2</sub> Benzenes, C<sub>3</sub> Benzenes, and phenol, as well as temperature and pressure. As MVK and MACR are isomers, their Vocus measurement was split in a 0.34:0.66 ratio. This ratio was determined by box model acquired using the base MCM mechanism but with MVK and MACR constraints excluded. Total C<sub>2</sub> and C<sub>3</sub> benzene concentrations were assumed as mixtures of all isomers split into equal parts. For example C<sub>2</sub> benzene measurements were divided equally into MCM inputs of ethyl benzene, o-xylene, m-xylene, and p-xylene. For mechanisms that included manually written BB VOC chemistry (Coggon et al., 2019), additional observational constraints of furan, methyl furan, furfural, methyl furfural, guaiacol, and catechol were included. Since catechol and methyl furfural are isomers, the Vocus measurement of C<sub>6</sub>H<sub>6</sub>O<sub>2</sub>H<sup>+</sup> was split into equal parts. For photolysis reactions, we constrained our derived values for J<sub>NO<sub>2</sub></sub> and J<sub>O<sub>3</sub></sub> (see Sect. 5). Other photolysis frequency values are then determined within F0AM based on these constraints.

Two instruments - Vocus and cTAG - measured many common species such as benzene, toluene, and isoprene. For these species, Vocus data were used as model inputs due to the faster Vocus time resolution and better overall data coverage for our periods of interest. While data coverage for other AML-based and site-based instruments was sufficient (data gaps < 60 minutes), there were two periods in which Vocus had extended gaps (> 6 hrs). Typical data gaps were shorter than 1 hour and filled via linear interpolation. However, these extended Vocus data gaps occurred on 17 August and 21 August and were filled with their corresponding cTAG measurements. Two compounds constrained in the model runs - 2-MBO and styrene - were unique to cTAG. However, cTAG data coverage had extended data gaps (e.g. missing a few entire days of interest). As 2-MBO and styrene correlated with isoprene and toluene, these cTAG compounds were assumed to maintain a constant ratio to their counterparts during periods of low cTAG data coverage.

The total C<sub>10</sub>H<sub>16</sub> (monoterpenes) and C<sub>5</sub>H<sub>8</sub> (mostly isoprene) concentrations measured by the Vocus PTR-MS were higher than those measured by the cTAG because the Vocus also measures isomers and artefacts of in-source fragmentation. Therefore, Vocus data was scaled to account for the fragmentation not observed by cTAG. Vocus isoprene was scaled by a factor of 0.66. Vocus total monoterpenes were scaled by a factor of 0.25 to match the trends observed for the sum of cTAG speciated monoterpenes. The F0AM monoterpene inputs for the chemical mechanisms used in this manuscript are partially speciated into α-pinene, β-pinene, and limonene. The total monoterpene signal was split into these categories based on the speciated cTAG observations. Along with α-pinene, β-pinene, and limonene, cTAG measured additional monoterpenes of 3-carene, β-phellandrene, and camphene. These additional monoterpenes were lumped into the F0AM relevant species based on their respective double bond positions, similar to the categorization suggested by Coggon et al. (2019). 3-carene was lumped with α-pinene, camphene was lumped with β-pinene, and β-phellandrene was lumped with limonene. The categories of α-pinene, β-pinene, and limonene maintained an average ratio of 0.49:0.42:0.09. As this ratio had little variation among all times with cTAG data, this ratio was applied to the Vocus total monoterpene measurement to include in F0AM model runs.

Heterogeneous uptake of HO<sub>2</sub> was included in the MCM-BBVOC-het mechanism by adding an additional HO<sub>2</sub> loss reaction that nets no product. The rate of this reaction was calculated with the following equation:

$$\frac{d[\text{HO}_2]}{dt} = -\frac{1}{4} \cdot \gamma \cdot c \cdot S \cdot [\text{HO}_2] \quad (1)$$

where  $\gamma$  represents the HO<sub>2</sub> uptake coefficient,  $c$  represents the mean molecular speed of HO<sub>2</sub>, and  $S$  represents the aerosol surface area concentration (cm<sup>2</sup> m<sup>-3</sup>). While  $c$  is derived from molecular weight and temperature, the parameters of  $\gamma$  and  $S$  are not as easily attainable.  $S$  was calculated from mass concentrations by multiplying by specific surface area (m<sup>2</sup> g<sup>-1</sup>). We only considered organic aerosol mass concentrations for heterogeneous loss, which contributed the overwhelming majority of PM mass observations. The selected values of specific surface area and  $\gamma$  were held constant throughout model runs. The impact of  $\gamma$  and specific surface area on model predictions were tested with a separate GOES-Chem mechanism that included this same heterogeneous HO<sub>2</sub> uptake chemistry. Figure S7 shows the impact of varying  $\gamma$  while specific area was held at our standard value of 2 m<sup>2</sup> g<sup>-1</sup>. Figure S8 shows the impact of varying specific surface area while  $\gamma$  was held at our standard value of 0.2.

While observational constraints discussed within this section focus on MCM, GEOS-Chem constraints were comparatively limited. There were no observational constraints exclusive to GEOS-Chem. Rather GEOS-Chem lacked inputs for several species. This includes ethyne, all previously listed aromatic compounds, and BBVOCs.

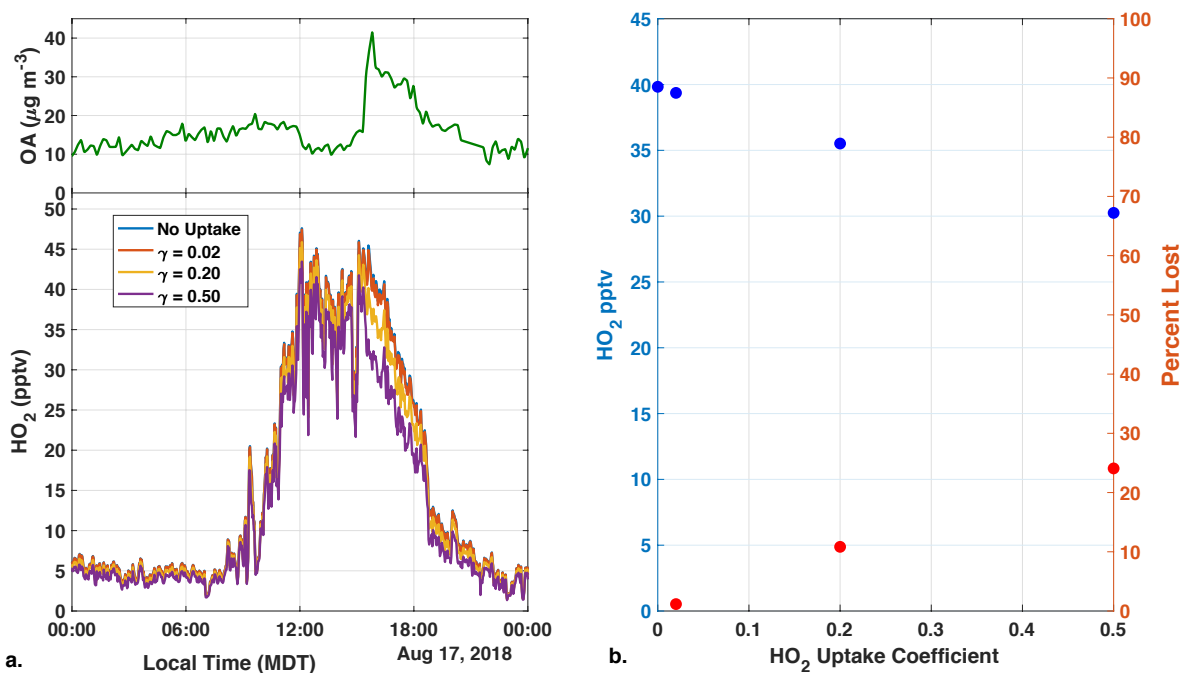

**Figure S7.** Impact of uptake coefficient on model predictions of HO<sub>2</sub>. The heterogeneous uptake chemistry typically included in the MCM-BBVOC-het mechanism was included into the GEOS-Chem mechanism for this experiment. Panel A shows the time series of organic aerosol and model outputs of HO<sub>2</sub> with different uptake coefficients ( $\gamma$ ). Panel B shows the impact of implementing heterogeneous uptake on part of the 17 August BB influenced period of 15:40 MDT to 16:30 MDT. Blue markers represent predicted HO<sub>2</sub> concentration at each  $\gamma$  setting. The red markers are the percent loss in HO<sub>2</sub> relative to the base GEOS-Chem condition with no heterogeneous uptake.



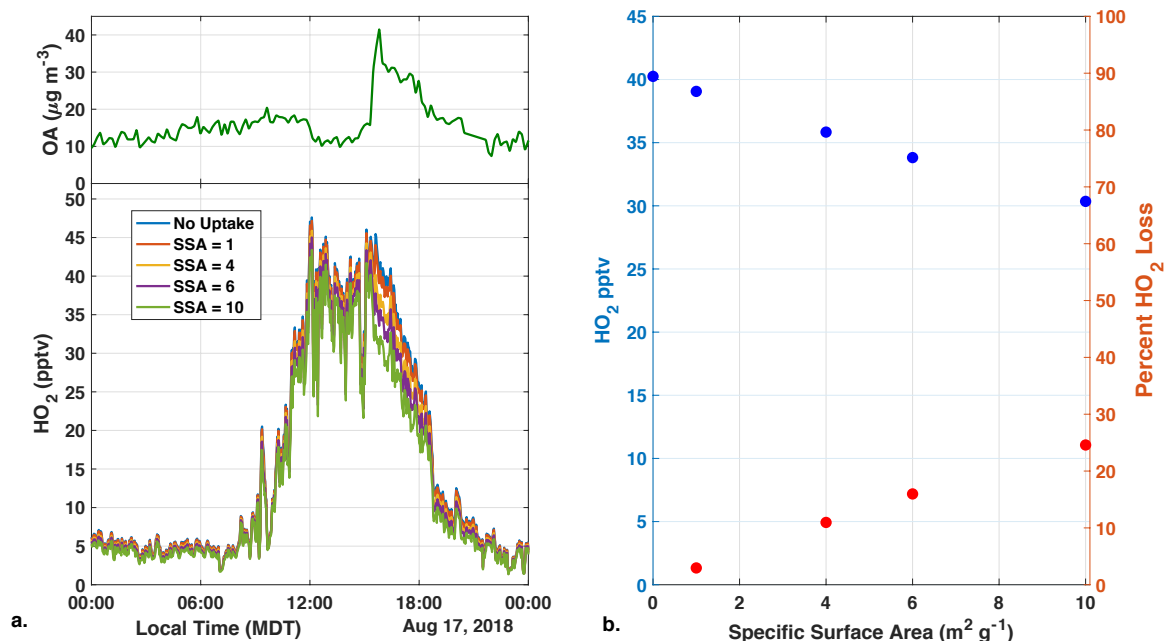

**Figure S8.** Impact of aerosol specific surface area on model predictions of  $\text{HO}_2$ . The heterogeneous uptake chemistry typically included in the MCM-BBVOC-het mechanism was included into the GEOS-Chem mechanism for this experiment. Panel A shows the time series of organic aerosol and model outputs of  $\text{HO}_2$  with different aerosol specific surface areas (SSA) represented in the legend with units of  $\text{m}^2 \text{g}^{-1}$ . Panel B shows the impact of implementing heterogeneous uptake on part of the 17 August BB influenced period of 15:40 MDT to 16:30 MDT. Blue markers represent predicted  $\text{HO}_2$  concentration at each  $\gamma$  setting. The red markers are the percent loss in  $\text{HO}_2$  relative to the base GEOS-Chem condition with no heterogeneous uptake.

165

## 170 S7 Supplemental Model Results

Supplemental model results, similar to MCM-BBVOC results shared in Figure 6 of the main text, are shared in Figures S8-10. Each figure includes the model outputs of speciated peroxy radicals,  $[\text{OH}]$ , and OH reactivity for unique mechanisms - MCM-base, MCM-BBVOC-het, and GEOS-Chem. While  $[\text{OH}]$  and OH reactivities remain similar across all MCM derived mechanisms, the GEOS-Chem results are most notably different. GEOS-Chem  $[\text{OH}]$  was on average  $\sim 75\%$  greater than MCM-base predictions (note the extended  $[\text{OH}]$  y axis in Figure S10. GEOS-Chem OH reactivity was limited due to the limited chemical species constrained. The most notable omission was BB VOCs, though other categories of MBO and aromatics are not represented as the measured species are not present in version of GEOS-Chem that was used.

175

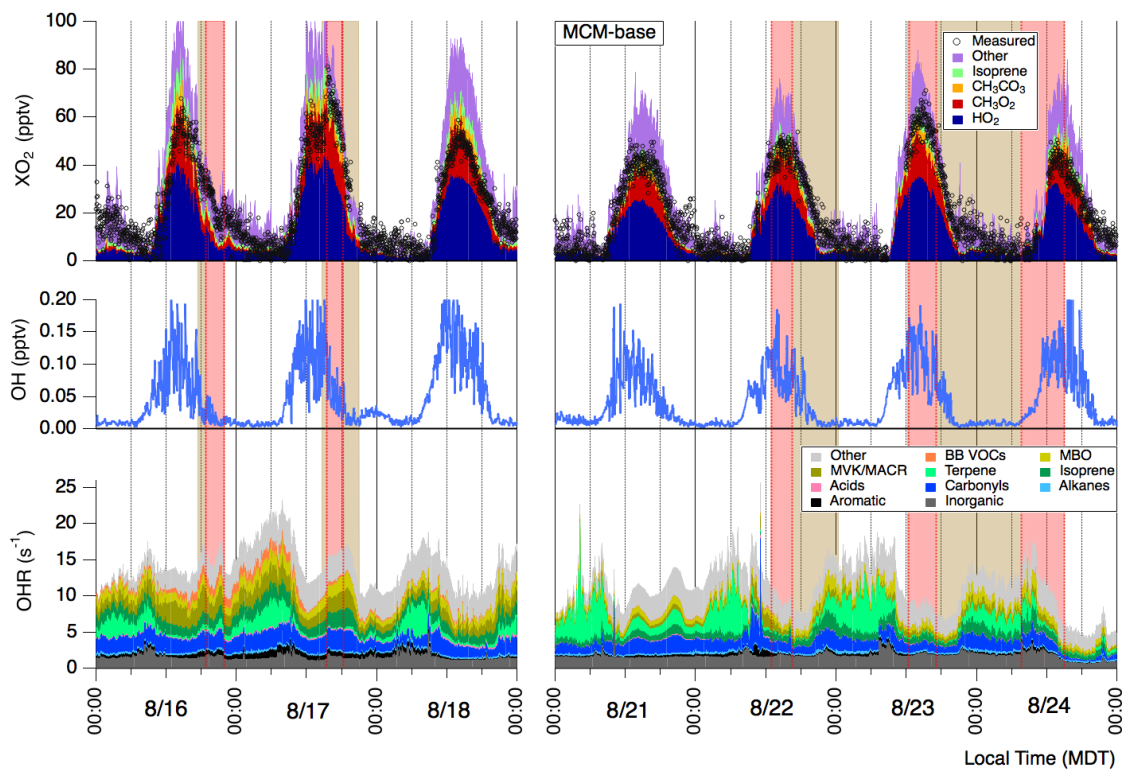

180 **Figure S9.** Time series of modeled OH, HO<sub>2</sub>, speciated RO<sub>2</sub>, and OH reactivity (OHR). These results were acquired using base MCM model. Periods of smoke are shaded as per Figure 2 of the main text. Measured XO<sub>2</sub> is included as black markers for comparison.

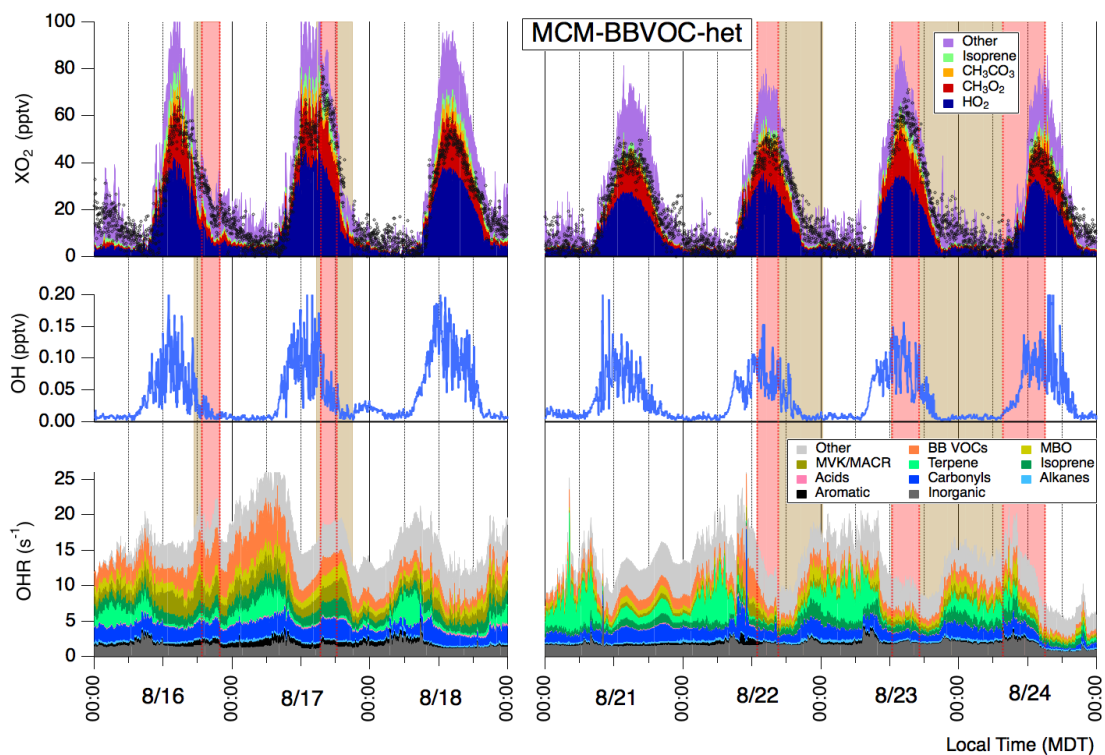

**Figure S10.** Same as S-Figure X but model results were acquired with the MCM 3.3.1 mechanism including additional BB VOC chemistry and heterogeneous HO<sub>2</sub> uptake (MCM-BBVOC-het).

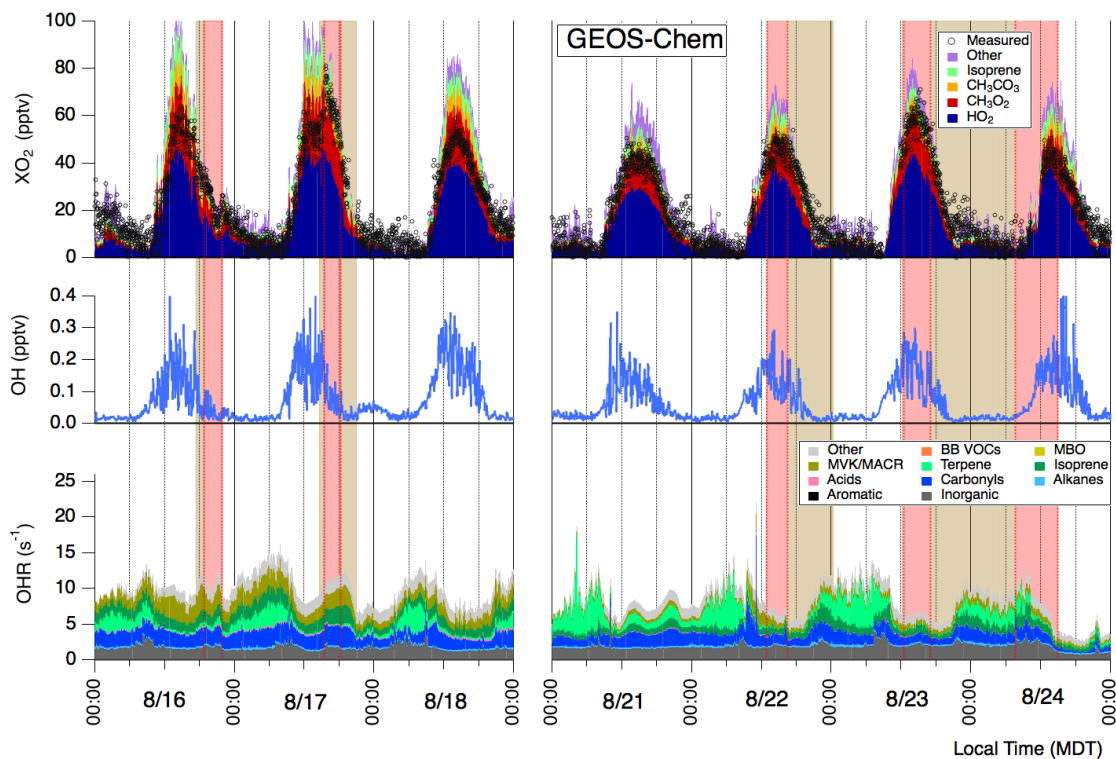

**Figure S11.** Same as S-Figure X but model results were acquired with the base version of GEOS-Chem.

### S8 Measured and Modeled HOx production

190 The 17 August period of BB influence had a distinct enhancement in  $[XO_2]$ , though changes in  $P(HO_x)$  appeared to be minimal. Figure S12 shows time series for HOx precursors of  $O_3$  and HCHO along with  $J_{NO_2}$  and water vapor during this event. A relative increase in  $[O_3]$  27% (or 15 pptv) was counteracted by a similarly sized decline in water vapor. The result was a minimal impact on  $P(HO_x)$ .

195 Figure S13 shows the components of modeled HOx production, similar to Figure 8 of the main text, for the date range of 21 through 24 August. The breakdown of HOx sources and sinks are generally consistent with that observed for 16 through 18 August. Appreciable heterogeneous losses are predicted midday on 23 and 24 August during BB influenced periods. On both of these days, heterogeneous losses approach termination rates equal to 10% of total HOx termination.

200

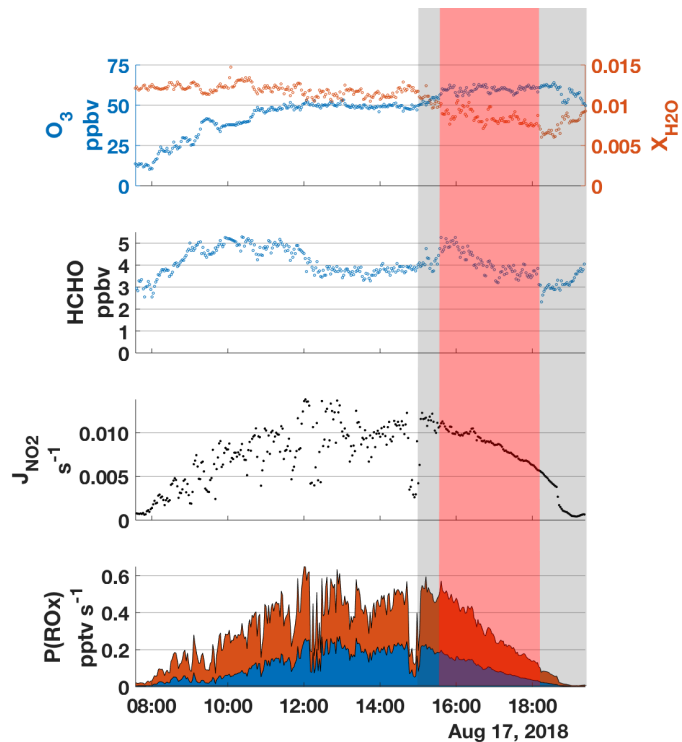

**Figure S12.** Investigation of P(ROx) on 17 August 2018. Time series of ROx precursors of O<sub>3</sub> and HCHO are included along with NO<sub>2</sub> photolysis and water mixing ratio X<sub>H2O</sub>. Periods of BB influence and significant BB influence ([HCN] > 1.0 ppb) are shaded grey and red, respectively.

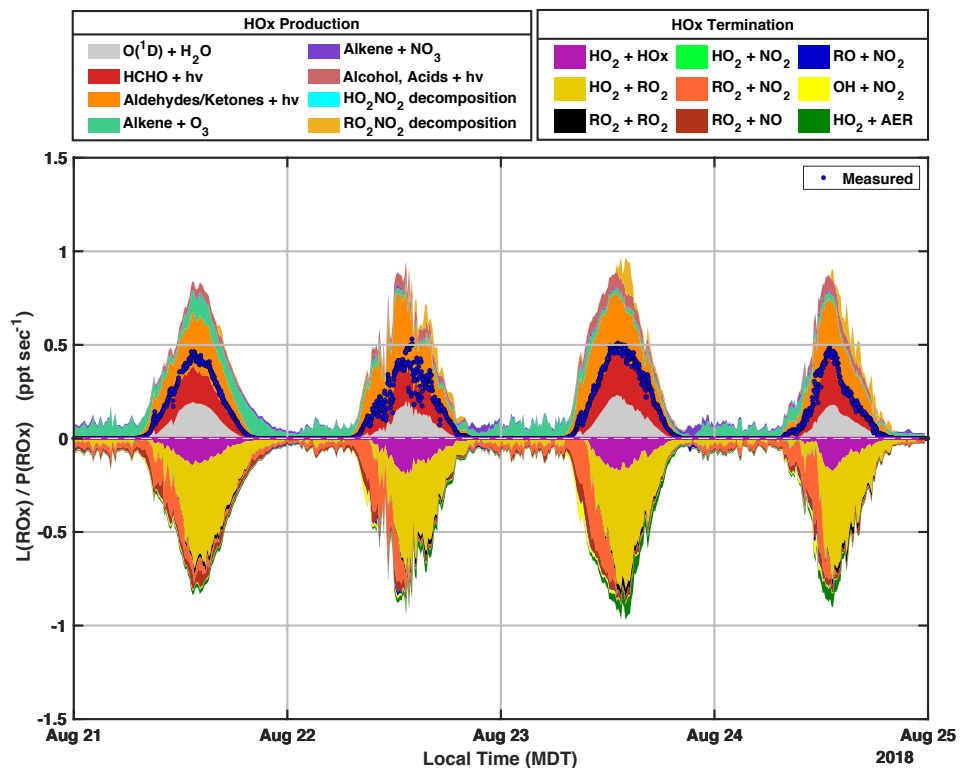

**Figure S13.** Modeled ROx production and termination for 21, 22, 23, and 24 August. The results provided were modeled with F0AM using the MCM-BBVOC-het mechanism. NROx termination L(ROx) and ROx production P(ROx) are separated into several straightforward categories as represented in their respective legends. For reversible processes, net rates are shown. Heterogenous HO<sub>2</sub> loss is represented by the HO<sub>2</sub> +

205

AER. P(ROx) derived from direct measurements, as presented in Figure 3 of the main text, is shown in the main text and is represented by the blue markers. Modeled results were averaged from 2-minute intervals to 10-minute intervals, while the measured data is shown in 2-minute intervals.

210

## References

Anderson, D. C., Pavelec, J., Daube, C., Herndon, S. C., Knighton, W. B., Lerner, B. M., Roscioli, J. R., Yacovitch, T. I., and Wood, E. C.: Characterization of ozone production in San Antonio, Texas, using measurements of total peroxy radicals, *Atmospheric Chemistry and Physics*, 19, 2845-2860, 2019.

215 Coggon, M. M., Lim, C. Y., Koss, A. R., Sekimoto, K., Yuan, B., Gilman, J. B., Hagan, D. H., Selimovic, V., Zarzana, K. J., and Brown, S. S.: OH chemistry of non-methane organic gases (NMOGs) emitted from laboratory and ambient biomass burning smoke: evaluating the influence of furans and oxygenated aromatics on ozone and secondary NMOG formation, *Atmospheric Chemistry and Physics*, 19, 14875-14899, 2019.

220 Fisher, J. A., Jacob, D. J., Travis, K. R., Kim, P. S., Marais, E. A., Miller, C. C., Yu, K., Zhu, L., Yantosca, R. M., and Sulprizio, M. P.: Organic nitrate chemistry and its implications for nitrogen budgets in an isoprene-and monoterpene-rich atmosphere: constraints from aircraft (SEAC4RS) and ground-based (SOAS) observations in the Southeast US, *Atmospheric chemistry and physics*, 16, 5969, 2016.

Jaffe, D. A., and Wigder, N. L.: Ozone production from wildfires: A critical review, *Atmospheric Environment*, 51, 1-10, 2012.

225 Jenkin, M., Saunders, S., Wagner, V., and Pilling, M.: Protocol for the development of the Master Chemical Mechanism, MCM v3 (Part B): tropospheric degradation of aromatic volatile organic compounds, *Atmospheric Chemistry and Physics*, 3, 181-193, 2003.

Jenkin, M., Young, J., and Rickard, A.: The MCM v3. 3.1 degradation scheme for isoprene, *Atmospheric Chemistry and Physics*, 15, 11433, 2015.

230 Kim, P. S., Jacob, D. J., Fisher, J. A., Travis, K., Yu, K., Zhu, L., Yantosca, R. M., Sulprizio, M., Jimenez, J. L., and Campuzano-Jost, P.: Sources, seasonality, and trends of southeast US aerosol: an integrated analysis of surface, aircraft, and satellite observations with the GEOS-Chem chemical transport model, 2015.

Mao, J., Paulot, F., Jacob, D. J., Cohen, R. C., Crouse, J. D., Wennberg, P. O., Keller, C. A., Hudman, R. C., Barkley, M. P., and Horowitz, L. W.: Ozone and organic nitrates over the eastern United States: Sensitivity to isoprene chemistry, *Journal of Geophysical Research: Atmospheres*, 118, 11,256-211,268, 2013.

235 Marais, E. A., Jacob, D. J., Jimenez, J. L., Campuzano-Jost, P., Day, D. A., Hu, W., Krechmer, J., Zhu, L., Kim, P. S., and Miller, C. C.: Aqueous-phase mechanism for secondary organic aerosol formation from isoprene: application to the southeast United States and co-benefit of SO<sub>2</sub> emission controls, 2016.

NOAA Hazard Mapping System Fire and Smoke Product: <https://www.ospo.noaa.gov/Products/land/hms.html#data>, access: 24 June 2021, 2021.

240 Saunders, S. M., Jenkin, M. E., Derwent, R., and Pilling, M.: Protocol for the development of the Master Chemical Mechanism, MCM v3 (Part A): tropospheric degradation of non-aromatic volatile organic compounds, 2003.

Stein, A., Draxler, R. R., Rolph, G. D., Stunder, B. J., Cohen, M., and Ngan, F.: NOAA's HYSPLIT atmospheric transport and dispersion modeling system, *Bulletin of the American Meteorological Society*, 96, 2059-2077, 2015.

245 Travis, K., Jacob, D., Fisher, J., Kim, P., Marais, E., Zhu, L., Miller, C., Wennberg, P., Crouse, J., and Hanisco, T.: NO<sub>x</sub> emissions, isoprene oxidation pathways, and implications for surface ozone in the Southeast United States, *Atmos. Chem. Phys. Discuss.*, submitted, 2016.

Wolfe, G. M., Marvin, M. R., Roberts, S. J., Travis, K. R., and Liao, J.: The framework for 0-D atmospheric modeling (FOAM) v3. 1, *Geoscientific Model Development*, 9, 3309, 2016.
